# Supplementary material
Source: PubMed Central journal article supplement (PMC2886096)
Supplement: djq174_1.pdf [file djq174_1.pdf]

**Pediatric Phase I Trial Design Using Maximum Target Inhibition as the Primary Endpoint\***

Probability Worksheet

|                |     |               |     |
|----------------|-----|---------------|-----|
| <b>DLT Yes</b> | 0.7 | <b>PD Yes</b> | 0.9 |
| <b>DLT No</b>  | 0.3 | <b>PD No</b>  | 0.1 |

| Patient 1   |     | Patient 2 |     | Probability | Stop   | Expand | Escalate |
|-------------|-----|-----------|-----|-------------|--------|--------|----------|
| DLT         | PD  | DLT       | PD  |             |        |        |          |
| No          | No  | No        | No  | 0.0009      | 0      | 0      | 0.0009   |
| No          | No  | No        | Yes | 0.0081      | 0      | 0      | 0.0081   |
| No          | No  | Yes       | No  | 0.0021      | 0      | 0.0021 | 0        |
| No          | No  | Yes       | Yes | 0.0189      | 0      | 0.0189 | 0        |
| No          | Yes | No        | No  | 0.0081      | 0      | 0      | 0.0081   |
| No          | Yes | No        | Yes | 0.0729      | 0      | 0.0729 | 0        |
| No          | Yes | Yes       | No  | 0.0189      | 0      | 0.0189 | 0        |
| No          | Yes | Yes       | Yes | 0.1701      | 0      | 0.1701 | 0        |
| Yes         | No  | No        | No  | 0.0021      | 0      | 0.0021 | 0        |
| Yes         | No  | No        | Yes | 0.0189      | 0      | 0.0189 | 0        |
| Yes         | No  | Yes       | No  | 0.0049      | 0.0049 | 0      | 0        |
| Yes         | No  | Yes       | Yes | 0.0441      | 0.0441 | 0      | 0        |
| Yes         | Yes | No        | No  | 0.0189      | 0      | 0.0189 | 0        |
| Yes         | Yes | No        | Yes | 0.1701      | 0      | 0.1701 | 0        |
| Yes         | Yes | Yes       | No  | 0.0441      | 0.0441 | 0      | 0        |
| Yes         | Yes | Yes       | Yes | 0.3969      | 0.3969 | 0      | 0        |
| Probability |     |           |     |             | 0.4900 | 0.4929 | 0.0171   |

1

| Patient 3 |    | Patient 4 |    | Patient 5 |     | Patient 6 |     | Probability |
|-----------|----|-----------|----|-----------|-----|-----------|-----|-------------|
| DLT       | PD | DLT       | PD | DLT       | PD  | DLT       | PD  |             |
| No        | No | No        | No | No        | No  | No        | No  | 0.00000081  |
| No        | No | No        | No | No        | No  | No        | Yes | 0.00000729  |
| No        | No | No        | No | No        | No  | Yes       | No  | 0.00000189  |
| No        | No | No        | No | No        | No  | Yes       | Yes | 0.00001701  |
| No        | No | No        | No | No        | Yes | No        | No  | 0.00000729  |

|    |    |     |     |     |     |     |     |            |
|----|----|-----|-----|-----|-----|-----|-----|------------|
| No | No | No  | No  | No  | Yes | No  | Yes | 0.00006561 |
| No | No | No  | No  | No  | Yes | Yes | No  | 0.00001701 |
| No | No | No  | No  | No  | Yes | Yes | Yes | 0.00015309 |
| No | No | No  | No  | Yes | No  | No  | No  | 0.00000189 |
| No | No | No  | No  | Yes | No  | No  | Yes | 0.00001701 |
| No | No | No  | No  | Yes | No  | Yes | No  | 0.00000441 |
| No | No | No  | No  | Yes | No  | Yes | Yes | 0.00003969 |
| No | No | No  | No  | Yes | Yes | No  | No  | 0.00001701 |
| No | No | No  | No  | Yes | Yes | No  | Yes | 0.00015309 |
| No | No | No  | No  | Yes | Yes | Yes | No  | 0.00003969 |
| No | No | No  | No  | Yes | Yes | Yes | Yes | 0.00035721 |
| No | No | No  | Yes | No  | No  | No  | No  | 0.00000729 |
| No | No | No  | Yes | No  | No  | No  | Yes | 0.00006561 |
| No | No | No  | Yes | No  | No  | Yes | No  | 0.00001701 |
| No | No | No  | Yes | No  | No  | Yes | Yes | 0.00015309 |
| No | No | No  | Yes | No  | Yes | No  | No  | 0.00006561 |
| No | No | No  | Yes | No  | Yes | No  | Yes | 0.00059049 |
| No | No | No  | Yes | No  | Yes | Yes | No  | 0.00015309 |
| No | No | No  | Yes | No  | Yes | Yes | Yes | 0.00137781 |
| No | No | No  | Yes | Yes | No  | No  | No  | 0.00001701 |
| No | No | No  | Yes | Yes | No  | No  | Yes | 0.00015309 |
| No | No | No  | Yes | Yes | No  | Yes | No  | 0.00003969 |
| No | No | No  | Yes | Yes | No  | Yes | Yes | 0.00035721 |
| No | No | No  | Yes | Yes | Yes | No  | No  | 0.00015309 |
| No | No | No  | Yes | Yes | Yes | No  | Yes | 0.00137781 |
| No | No | No  | Yes | Yes | Yes | Yes | No  | 0.00035721 |
| No | No | No  | Yes | Yes | Yes | Yes | Yes | 0.00321489 |
| No | No | Yes | No  | No  | No  | No  | No  | 0.00000189 |
| No | No | Yes | No  | No  | No  | No  | Yes | 0.00001701 |
| No | No | Yes | No  | No  | No  | Yes | No  | 0.00000441 |
| No | No | Yes | No  | No  | No  | Yes | Yes | 0.00003969 |
| No | No | Yes | No  | No  | Yes | No  | No  | 0.00001701 |
| No | No | Yes | No  | No  | Yes | No  | Yes | 0.00015309 |
| No | No | Yes | No  | No  | Yes | Yes | No  | 0.00003969 |
| No | No | Yes | No  | No  | Yes | Yes | Yes | 0.00035721 |
| No | No | Yes | No  | Yes | No  | No  | No  | 0.00000441 |

|    |     |     |     |     |     |     |     |            |
|----|-----|-----|-----|-----|-----|-----|-----|------------|
| No | No  | Yes | No  | Yes | No  | No  | Yes | 0.00003969 |
| No | No  | Yes | No  | Yes | No  | Yes | No  | 0.00001029 |
| No | No  | Yes | No  | Yes | No  | Yes | Yes | 0.00009261 |
| No | No  | Yes | No  | Yes | Yes | No  | No  | 0.00003969 |
| No | No  | Yes | No  | Yes | Yes | No  | Yes | 0.00035721 |
| No | No  | Yes | No  | Yes | Yes | Yes | No  | 0.00009261 |
| No | No  | Yes | No  | Yes | Yes | Yes | Yes | 0.00083349 |
| No | No  | Yes | Yes | No  | No  | No  | No  | 0.00001701 |
| No | No  | Yes | Yes | No  | No  | No  | Yes | 0.00015309 |
| No | No  | Yes | Yes | No  | No  | Yes | No  | 0.00003969 |
| No | No  | Yes | Yes | No  | No  | Yes | Yes | 0.00035721 |
| No | No  | Yes | Yes | No  | Yes | No  | Yes | 0.00015309 |
| No | No  | Yes | Yes | No  | Yes | No  | Yes | 0.00137781 |
| No | No  | Yes | Yes | No  | Yes | Yes | No  | 0.00035721 |
| No | No  | Yes | Yes | No  | Yes | Yes | Yes | 0.00321489 |
| No | No  | Yes | Yes | Yes | No  | No  | No  | 0.00003969 |
| No | No  | Yes | Yes | Yes | No  | No  | Yes | 0.00035721 |
| No | No  | Yes | Yes | Yes | No  | Yes | No  | 0.00009261 |
| No | No  | Yes | Yes | Yes | No  | Yes | Yes | 0.00083349 |
| No | No  | Yes | Yes | Yes | Yes | No  | No  | 0.00035721 |
| No | No  | Yes | Yes | Yes | Yes | No  | Yes | 0.00321489 |
| No | No  | Yes | Yes | Yes | Yes | Yes | No  | 0.00083349 |
| No | No  | Yes | Yes | Yes | Yes | Yes | Yes | 0.00750141 |
| No | Yes | No  | No  | No  | No  | No  | No  | 0.00000729 |
| No | Yes | No  | No  | No  | No  | No  | Yes | 0.00006561 |
| No | Yes | No  | No  | No  | No  | Yes | No  | 0.00001701 |
| No | Yes | No  | No  | No  | No  | Yes | Yes | 0.00015309 |
| No | Yes | No  | No  | No  | Yes | No  | No  | 0.00006561 |
| No | Yes | No  | No  | No  | Yes | No  | Yes | 0.00059049 |
| No | Yes | No  | No  | No  | Yes | Yes | No  | 0.00015309 |
| No | Yes | No  | No  | No  | Yes | Yes | Yes | 0.00137781 |
| No | Yes | No  | No  | Yes | No  | No  | No  | 0.00001701 |
| No | Yes | No  | No  | Yes | No  | No  | Yes | 0.00015309 |
| No | Yes | No  | No  | Yes | No  | Yes | No  | 0.00003969 |
| No | Yes | No  | No  | Yes | No  | Yes | Yes | 0.00035721 |
| No | Yes | No  | No  | Yes | Yes | No  | No  | 0.00015309 |

|    |     |     |     |     |     |     |     |            |
|----|-----|-----|-----|-----|-----|-----|-----|------------|
| No | Yes | No  | No  | Yes | Yes | No  | Yes | 0.00137781 |
| No | Yes | No  | No  | Yes | Yes | Yes | No  | 0.00035721 |
| No | Yes | No  | No  | Yes | Yes | Yes | Yes | 0.00321489 |
| No | Yes | No  | Yes | No  | No  | No  | No  | 0.00006561 |
| No | Yes | No  | Yes | No  | No  | No  | Yes | 0.00059049 |
| No | Yes | No  | Yes | No  | No  | Yes | No  | 0.00015309 |
| No | Yes | No  | Yes | No  | No  | Yes | Yes | 0.00137781 |
| No | Yes | No  | Yes | No  | Yes | No  | No  | 0.00059049 |
| No | Yes | No  | Yes | No  | Yes | No  | Yes | 0.00531441 |
| No | Yes | No  | Yes | No  | Yes | Yes | No  | 0.00137781 |
| No | Yes | No  | Yes | No  | Yes | Yes | Yes | 0.01240029 |
| No | Yes | No  | Yes | Yes | No  | No  | No  | 0.00015309 |
| No | Yes | No  | Yes | Yes | No  | No  | Yes | 0.00137781 |
| No | Yes | No  | Yes | Yes | No  | Yes | No  | 0.00035721 |
| No | Yes | No  | Yes | Yes | No  | Yes | Yes | 0.00321489 |
| No | Yes | No  | Yes | Yes | Yes | No  | No  | 0.00137781 |
| No | Yes | No  | Yes | Yes | Yes | No  | Yes | 0.01240029 |
| No | Yes | No  | Yes | Yes | Yes | Yes | No  | 0.00321489 |
| No | Yes | No  | Yes | Yes | Yes | Yes | Yes | 0.02893401 |
| No | Yes | Yes | No  | No  | No  | No  | No  | 0.00001701 |
| No | Yes | Yes | No  | No  | No  | No  | Yes | 0.00015309 |
| No | Yes | Yes | No  | No  | No  | Yes | No  | 0.00003969 |
| No | Yes | Yes | No  | No  | No  | Yes | Yes | 0.00035721 |
| No | Yes | Yes | No  | No  | Yes | No  | No  | 0.00015309 |
| No | Yes | Yes | No  | No  | Yes | No  | Yes | 0.00137781 |
| No | Yes | Yes | No  | No  | Yes | Yes | No  | 0.00035721 |
| No | Yes | Yes | No  | No  | Yes | Yes | Yes | 0.00321489 |
| No | Yes | Yes | No  | Yes | No  | No  | No  | 0.00003969 |
| No | Yes | Yes | No  | Yes | No  | No  | Yes | 0.00035721 |
| No | Yes | Yes | No  | Yes | No  | Yes | No  | 0.00009261 |
| No | Yes | Yes | No  | Yes | No  | Yes | Yes | 0.00083349 |
| No | Yes | Yes | No  | Yes | Yes | No  | No  | 0.00035721 |
| No | Yes | Yes | No  | Yes | Yes | No  | Yes | 0.00321489 |
| No | Yes | Yes | No  | Yes | Yes | Yes | No  | 0.00083349 |
| No | Yes | Yes | No  | Yes | Yes | Yes | Yes | 0.00750141 |
| No | Yes | Yes | Yes | No  | No  | No  | No  | 0.00015309 |

|     |     |     |     |     |     |     |     |            |
|-----|-----|-----|-----|-----|-----|-----|-----|------------|
| No  | Yes | Yes | Yes | No  | No  | No  | Yes | 0.00137781 |
| No  | Yes | Yes | Yes | No  | No  | Yes | No  | 0.00035721 |
| No  | Yes | Yes | Yes | No  | No  | Yes | Yes | 0.00321489 |
| No  | Yes | Yes | Yes | No  | Yes | No  | No  | 0.00137781 |
| No  | Yes | Yes | Yes | No  | Yes | No  | Yes | 0.01240029 |
| No  | Yes | Yes | Yes | No  | Yes | Yes | No  | 0.00321489 |
| No  | Yes | Yes | Yes | No  | Yes | Yes | Yes | 0.02893401 |
| No  | Yes | Yes | Yes | Yes | No  | No  | No  | 0.00035721 |
| No  | Yes | Yes | Yes | Yes | No  | No  | Yes | 0.00321489 |
| No  | Yes | Yes | Yes | Yes | No  | Yes | No  | 0.00083349 |
| No  | Yes | Yes | Yes | Yes | No  | Yes | Yes | 0.00750141 |
| No  | Yes | Yes | Yes | Yes | Yes | No  | No  | 0.00321489 |
| No  | Yes | Yes | Yes | Yes | Yes | No  | Yes | 0.02893401 |
| No  | Yes | Yes | Yes | Yes | Yes | Yes | No  | 0.00750141 |
| No  | Yes | 0.06751269 |
| Yes | No  | 0.00000189 |
| Yes | No  | No  | No  | No  | No  | No  | Yes | 0.00001701 |
| Yes | No  | No  | No  | No  | No  | Yes | No  | 0.00000441 |
| Yes | No  | No  | No  | No  | No  | Yes | Yes | 0.00003969 |
| Yes | No  | No  | No  | No  | Yes | No  | No  | 0.00001701 |
| Yes | No  | No  | No  | No  | Yes | No  | Yes | 0.00015309 |
| Yes | No  | No  | No  | No  | Yes | Yes | No  | 0.00003969 |
| Yes | No  | No  | No  | No  | Yes | Yes | Yes | 0.00035721 |
| Yes | No  | No  | No  | Yes | No  | No  | No  | 0.00000441 |
| Yes | No  | No  | No  | Yes | No  | No  | Yes | 0.00003969 |
| Yes | No  | No  | No  | Yes | No  | Yes | No  | 0.00001029 |
| Yes | No  | No  | No  | Yes | No  | Yes | Yes | 0.00009261 |
| Yes | No  | No  | No  | Yes | Yes | No  | No  | 0.00003969 |
| Yes | No  | No  | No  | Yes | Yes | No  | Yes | 0.00035721 |
| Yes | No  | No  | No  | Yes | Yes | Yes | No  | 0.00009261 |
| Yes | No  | No  | No  | Yes | Yes | Yes | Yes | 0.00083349 |
| Yes | No  | No  | Yes | No  | No  | No  | No  | 0.00001701 |
| Yes | No  | No  | Yes | No  | No  | No  | Yes | 0.00015309 |
| Yes | No  | No  | Yes | No  | No  | Yes | No  | 0.00003969 |
| Yes | No  | No  | Yes | No  | No  | Yes | Yes | 0.00035721 |
| Yes | No  | No  | Yes | No  | Yes | No  | No  | 0.00015309 |

|     |    |     |     |     |     |     |     |            |
|-----|----|-----|-----|-----|-----|-----|-----|------------|
| Yes | No | No  | Yes | No  | Yes | No  | Yes | 0.00137781 |
| Yes | No | No  | Yes | No  | Yes | Yes | No  | 0.00035721 |
| Yes | No | No  | Yes | No  | Yes | Yes | Yes | 0.00321489 |
| Yes | No | No  | Yes | Yes | No  | No  | No  | 0.00003969 |
| Yes | No | No  | Yes | Yes | No  | No  | Yes | 0.00035721 |
| Yes | No | No  | Yes | Yes | No  | Yes | No  | 0.00009261 |
| Yes | No | No  | Yes | Yes | No  | Yes | Yes | 0.00083349 |
| Yes | No | No  | Yes | Yes | Yes | No  | No  | 0.00035721 |
| Yes | No | No  | Yes | Yes | Yes | No  | Yes | 0.00321489 |
| Yes | No | No  | Yes | Yes | Yes | Yes | No  | 0.00083349 |
| Yes | No | No  | Yes | Yes | Yes | Yes | Yes | 0.00750141 |
| Yes | No | Yes | No  | No  | No  | No  | No  | 0.00000441 |
| Yes | No | Yes | No  | No  | No  | No  | Yes | 0.00003969 |
| Yes | No | Yes | No  | No  | No  | Yes | No  | 0.00001029 |
| Yes | No | Yes | No  | No  | No  | Yes | Yes | 0.00009261 |
| Yes | No | Yes | No  | No  | Yes | No  | No  | 0.00003969 |
| Yes | No | Yes | No  | No  | Yes | No  | Yes | 0.00035721 |
| Yes | No | Yes | No  | No  | Yes | Yes | No  | 0.00009261 |
| Yes | No | Yes | No  | No  | Yes | Yes | Yes | 0.00083349 |
| Yes | No | Yes | No  | Yes | No  | No  | No  | 0.00001029 |
| Yes | No | Yes | No  | Yes | No  | No  | Yes | 0.00009261 |
| Yes | No | Yes | No  | Yes | No  | Yes | No  | 0.00002401 |
| Yes | No | Yes | No  | Yes | No  | Yes | Yes | 0.00021609 |
| Yes | No | Yes | No  | Yes | Yes | No  | No  | 0.00009261 |
| Yes | No | Yes | No  | Yes | Yes | No  | Yes | 0.00083349 |
| Yes | No | Yes | No  | Yes | Yes | Yes | No  | 0.00021609 |
| Yes | No | Yes | No  | Yes | Yes | Yes | Yes | 0.00194481 |
| Yes | No | Yes | Yes | No  | No  | No  | No  | 0.00003969 |
| Yes | No | Yes | Yes | No  | No  | No  | Yes | 0.00035721 |
| Yes | No | Yes | Yes | No  | No  | Yes | No  | 0.00009261 |
| Yes | No | Yes | Yes | No  | No  | Yes | Yes | 0.00083349 |
| Yes | No | Yes | Yes | No  | Yes | No  | No  | 0.00035721 |
| Yes | No | Yes | Yes | No  | Yes | No  | Yes | 0.00321489 |
| Yes | No | Yes | Yes | No  | Yes | Yes | No  | 0.00083349 |
| Yes | No | Yes | Yes | No  | Yes | Yes | Yes | 0.00750141 |
| Yes | No | Yes | Yes | Yes | No  | No  | No  | 0.00009261 |

|     |     |     |     |     |     |     |     |            |
|-----|-----|-----|-----|-----|-----|-----|-----|------------|
| Yes | No  | Yes | Yes | Yes | No  | No  | Yes | 0.00083349 |
| Yes | No  | Yes | Yes | Yes | No  | Yes | No  | 0.00021609 |
| Yes | No  | Yes | Yes | Yes | No  | Yes | Yes | 0.00194481 |
| Yes | No  | Yes | Yes | Yes | Yes | No  | No  | 0.00083349 |
| Yes | No  | Yes | Yes | Yes | Yes | No  | Yes | 0.00750141 |
| Yes | No  | Yes | Yes | Yes | Yes | Yes | No  | 0.00194481 |
| Yes | No  | Yes | Yes | Yes | Yes | Yes | Yes | 0.01750329 |
| Yes | Yes | No  | No  | No  | No  | No  | No  | 0.00001701 |
| Yes | Yes | No  | No  | No  | No  | No  | Yes | 0.00015309 |
| Yes | Yes | No  | No  | No  | No  | Yes | No  | 0.00003969 |
| Yes | Yes | No  | No  | No  | No  | Yes | Yes | 0.00035721 |
| Yes | Yes | No  | No  | No  | Yes | No  | No  | 0.00015309 |
| Yes | Yes | No  | No  | No  | Yes | No  | Yes | 0.00137781 |
| Yes | Yes | No  | No  | No  | Yes | Yes | No  | 0.00035721 |
| Yes | Yes | No  | No  | No  | Yes | Yes | Yes | 0.00321489 |
| Yes | Yes | No  | No  | Yes | No  | No  | No  | 0.00003969 |
| Yes | Yes | No  | No  | Yes | No  | No  | Yes | 0.00035721 |
| Yes | Yes | No  | No  | Yes | No  | Yes | No  | 0.00009261 |
| Yes | Yes | No  | No  | Yes | No  | Yes | Yes | 0.00083349 |
| Yes | Yes | No  | No  | Yes | Yes | No  | No  | 0.00035721 |
| Yes | Yes | No  | No  | Yes | Yes | No  | Yes | 0.00321489 |
| Yes | Yes | No  | No  | Yes | Yes | Yes | No  | 0.00083349 |
| Yes | Yes | No  | No  | Yes | Yes | Yes | Yes | 0.00750141 |
| Yes | Yes | No  | Yes | No  | No  | No  | No  | 0.00015309 |
| Yes | Yes | No  | Yes | No  | No  | No  | Yes | 0.00137781 |
| Yes | Yes | No  | Yes | No  | No  | Yes | No  | 0.00035721 |
| Yes | Yes | No  | Yes | No  | No  | Yes | Yes | 0.00321489 |
| Yes | Yes | No  | Yes | No  | Yes | No  | No  | 0.00137781 |
| Yes | Yes | No  | Yes | No  | Yes | No  | Yes | 0.01240029 |
| Yes | Yes | No  | Yes | No  | Yes | Yes | No  | 0.00321489 |
| Yes | Yes | No  | Yes | No  | Yes | Yes | Yes | 0.02893401 |
| Yes | Yes | No  | Yes | Yes | No  | No  | No  | 0.00035721 |
| Yes | Yes | No  | Yes | Yes | No  | No  | Yes | 0.00321489 |
| Yes | Yes | No  | Yes | Yes | No  | Yes | No  | 0.00083349 |
| Yes | Yes | No  | Yes | Yes | No  | Yes | Yes | 0.00750141 |
| Yes | Yes | No  | Yes | Yes | Yes | No  | No  | 0.00321489 |







|             |        |        |  |
|-------------|--------|--------|--|
|             | Expand |        |  |
| No DLT      | 0.0729 | 0.1479 |  |
| 1 DLT       | 0.4200 | 0.8521 |  |
| 1DLT + 2 PD | 0.3402 |        |  |
| DLT + <2 PD | 0.0798 |        |  |

|         |             |                               |
|---------|-------------|-------------------------------|
| ≥2 DLT  | 0.97339627  | <b>STOP - MTD exceeded</b>    |
| ≥5/6 PD | 0.009006685 | <b>STOP - PD Endpoint met</b> |
|         | 0.017597045 | <b>Escalate</b>               |

1

|         |            |            |               |               |               |               |
|---------|------------|------------|---------------|---------------|---------------|---------------|
| >1 DLTs | 1 DLT      | 0 DLT      | >2 PD & 0 DLT | <3 PD & 0 DLT | ≥3 PD & 1 DLT | <3 PD & 1 DLT |
| 0       | 0          | 0.00000081 | 0             | 0.00000081    | 0             | 0             |
| 0       | 0          | 0.00000729 | 0             | 0.00000729    | 0             | 0             |
| 0       | 0.00000189 | 0          | 0             | 0             | 0             | 0.00000189    |
| 0       | 0.00001701 | 0          | 0             | 0             | 0             | 0.00001701    |
| 0       | 0          | 0.00000729 | 0             | 0.00000729    | 0             | 0             |

|            |            |            |            |            |            |            |
|------------|------------|------------|------------|------------|------------|------------|
| 0          | 0          | 0.00006561 | 0          | 0.00006561 | 0          | 0          |
| 0          | 0.00001701 | 0          | 0          | 0          | 0          | 0.00001701 |
| 0          | 0.00015309 | 0          | 0          | 0          | 0          | 0.00015309 |
| 0          | 0.00000189 | 0          | 0          | 0          | 0          | 0.00000189 |
| 0          | 0.00001701 | 0          | 0          | 0          | 0          | 0.00001701 |
| 0.00000441 | 0          | 0          | 0          | 0          | 0          | 0          |
| 0.00003969 | 0          | 0          | 0          | 0          | 0          | 0          |
| 0          | 0.00001701 | 0          | 0          | 0          | 0          | 0.00001701 |
| 0          | 0.00015309 | 0          | 0          | 0          | 0          | 0.00015309 |
| 0.00003969 | 0          | 0          | 0          | 0          | 0          | 0          |
| 0.00035721 | 0          | 0          | 0          | 0          | 0          | 0          |
| 0          | 0          | 0.00000729 | 0          | 0.00000729 | 0          | 0          |
| 0          | 0          | 0.00006561 | 0          | 0.00006561 | 0          | 0          |
| 0          | 0.00001701 | 0          | 0          | 0          | 0          | 0.00001701 |
| 0          | 0.00015309 | 0          | 0          | 0          | 0          | 0.00015309 |
| 0          | 0          | 0.00006561 | 0          | 0.00006561 | 0          | 0          |
| 0          | 0          | 0.00059049 | 0.00059049 | 0          | 0          | 0          |
| 0          | 0.00015309 | 0          | 0          | 0          | 0          | 0.00015309 |
| 0          | 0.00137781 | 0          | 0          | 0          | 0.00137781 | 0          |
| 0          | 0.00001701 | 0          | 0          | 0          | 0          | 0.00001701 |
| 0          | 0.00015309 | 0          | 0          | 0          | 0          | 0.00015309 |
| 0.00003969 | 0          | 0          | 0          | 0          | 0          | 0          |
| 0.00035721 | 0          | 0          | 0          | 0          | 0          | 0          |
| 0          | 0.00015309 | 0          | 0          | 0          | 0          | 0.00015309 |
| 0          | 0.00137781 | 0          | 0          | 0          | 0.00137781 | 0          |
| 0.00035721 | 0          | 0          | 0          | 0          | 0          | 0          |
| 0.00321489 | 0          | 0          | 0          | 0          | 0          | 0          |
| 0          | 0.00000189 | 0          | 0          | 0          | 0          | 0.00000189 |
| 0          | 0.00001701 | 0          | 0          | 0          | 0          | 0.00001701 |
| 0.00000441 | 0          | 0          | 0          | 0          | 0          | 0          |
| 0.00003969 | 0          | 0          | 0          | 0          | 0          | 0          |
| 0          | 0.00001701 | 0          | 0          | 0          | 0          | 0.00001701 |
| 0          | 0.00015309 | 0          | 0          | 0          | 0          | 0.00015309 |
| 0.00003969 | 0          | 0          | 0          | 0          | 0          | 0          |
| 0.00035721 | 0          | 0          | 0          | 0          | 0          | 0          |
| 0.00000441 | 0          | 0          | 0          | 0          | 0          | 0          |

|            |            |            |            |            |            |            |
|------------|------------|------------|------------|------------|------------|------------|
| 0.00003969 | 0          | 0          | 0          | 0          | 0          | 0          |
| 0.00001029 | 0          | 0          | 0          | 0          | 0          | 0          |
| 0.00009261 | 0          | 0          | 0          | 0          | 0          | 0          |
| 0.00003969 | 0          | 0          | 0          | 0          | 0          | 0          |
| 0.00035721 | 0          | 0          | 0          | 0          | 0          | 0          |
| 0.00009261 | 0          | 0          | 0          | 0          | 0          | 0          |
| 0.00083349 | 0          | 0          | 0          | 0          | 0          | 0          |
| 0          | 0.00001701 | 0          | 0          | 0          | 0          | 0.00001701 |
| 0          | 0.00015309 | 0          | 0          | 0          | 0          | 0.00015309 |
| 0.00003969 | 0          | 0          | 0          | 0          | 0          | 0          |
| 0.00035721 | 0          | 0          | 0          | 0          | 0          | 0          |
| 0          | 0.00015309 | 0          | 0          | 0          | 0          | 0.00015309 |
| 0          | 0.00137781 | 0          | 0          | 0          | 0.00137781 | 0          |
| 0.00035721 | 0          | 0          | 0          | 0          | 0          | 0          |
| 0.00321489 | 0          | 0          | 0          | 0          | 0          | 0          |
| 0.00003969 | 0          | 0          | 0          | 0          | 0          | 0          |
| 0.00035721 | 0          | 0          | 0          | 0          | 0          | 0          |
| 0.00009261 | 0          | 0          | 0          | 0          | 0          | 0          |
| 0.00083349 | 0          | 0          | 0          | 0          | 0          | 0          |
| 0.00035721 | 0          | 0          | 0          | 0          | 0          | 0          |
| 0.00321489 | 0          | 0          | 0          | 0          | 0          | 0          |
| 0.00083349 | 0          | 0          | 0          | 0          | 0          | 0          |
| 0.00750141 | 0          | 0          | 0          | 0          | 0          | 0          |
| 0          | 0          | 0.00000729 | 0          | 0.00000729 | 0          | 0          |
| 0          | 0          | 0.00006561 | 0          | 0.00006561 | 0          | 0          |
| 0          | 0.00001701 | 0          | 0          | 0          | 0          | 0.00001701 |
| 0          | 0.00015309 | 0          | 0          | 0          | 0          | 0.00015309 |
| 0          | 0          | 0.00006561 | 0          | 0.00006561 | 0          | 0          |
| 0          | 0          | 0.00059049 | 0.00059049 | 0          | 0          | 0          |
| 0          | 0.00015309 | 0          | 0          | 0          | 0          | 0.00015309 |
| 0          | 0.00137781 | 0          | 0          | 0          | 0.00137781 | 0          |
| 0          | 0.00001701 | 0          | 0          | 0          | 0          | 0.00001701 |
| 0          | 0.00015309 | 0          | 0          | 0          | 0          | 0.00015309 |
| 0.00003969 | 0          | 0          | 0          | 0          | 0          | 0          |
| 0.00035721 | 0          | 0          | 0          | 0          | 0          | 0          |
| 0          | 0.00015309 | 0          | 0          | 0          | 0          | 0.00015309 |

|            |            |            |            |            |            |            |
|------------|------------|------------|------------|------------|------------|------------|
| 0          | 0.00137781 | 0          | 0          | 0          | 0.00137781 | 0          |
| 0.00035721 | 0          | 0          | 0          | 0          | 0          | 0          |
| 0.00321489 | 0          | 0          | 0          | 0          | 0          | 0          |
| 0          | 0          | 0.00006561 | 0          | 0.00006561 | 0          | 0          |
| 0          | 0          | 0.00059049 | 0.00059049 | 0          | 0          | 0          |
| 0          | 0.00015309 | 0          | 0          | 0          | 0          | 0.00015309 |
| 0          | 0.00137781 | 0          | 0          | 0          | 0.00137781 | 0          |
| 0          | 0          | 0.00059049 | 0.00059049 | 0          | 0          | 0          |
| 0          | 0          | 0.00531441 | 0.00531441 | 0          | 0          | 0          |
| 0          | 0.00137781 | 0          | 0          | 0          | 0.00137781 | 0          |
| 0          | 0.01240029 | 0          | 0          | 0          | 0.01240029 | 0          |
| 0          | 0.00015309 | 0          | 0          | 0          | 0          | 0.00015309 |
| 0          | 0.00137781 | 0          | 0          | 0          | 0.00137781 | 0          |
| 0.00035721 | 0          | 0          | 0          | 0          | 0          | 0          |
| 0.00321489 | 0          | 0          | 0          | 0          | 0          | 0          |
| 0          | 0.00137781 | 0          | 0          | 0          | 0.00137781 | 0          |
| 0          | 0.01240029 | 0          | 0          | 0          | 0.01240029 | 0          |
| 0.00321489 | 0          | 0          | 0          | 0          | 0          | 0          |
| 0.02893401 | 0          | 0          | 0          | 0          | 0          | 0          |
| 0          | 0.00001701 | 0          | 0          | 0          | 0          | 0.00001701 |
| 0          | 0.00015309 | 0          | 0          | 0          | 0          | 0.00015309 |
| 0.00003969 | 0          | 0          | 0          | 0          | 0          | 0          |
| 0.00035721 | 0          | 0          | 0          | 0          | 0          | 0          |
| 0          | 0.00015309 | 0          | 0          | 0          | 0          | 0.00015309 |
| 0          | 0.00137781 | 0          | 0          | 0          | 0.00137781 | 0          |
| 0.00035721 | 0          | 0          | 0          | 0          | 0          | 0          |
| 0.00321489 | 0          | 0          | 0          | 0          | 0          | 0          |
| 0.00003969 | 0          | 0          | 0          | 0          | 0          | 0          |
| 0.00035721 | 0          | 0          | 0          | 0          | 0          | 0          |
| 0.00009261 | 0          | 0          | 0          | 0          | 0          | 0          |
| 0.00083349 | 0          | 0          | 0          | 0          | 0          | 0          |
| 0.00035721 | 0          | 0          | 0          | 0          | 0          | 0          |
| 0.00321489 | 0          | 0          | 0          | 0          | 0          | 0          |
| 0.00083349 | 0          | 0          | 0          | 0          | 0          | 0          |
| 0.00750141 | 0          | 0          | 0          | 0          | 0          | 0          |
| 0          | 0.00015309 | 0          | 0          | 0          | 0          | 0.00015309 |

|            |            |   |   |   |            |            |
|------------|------------|---|---|---|------------|------------|
| 0          | 0.00137781 | 0 | 0 | 0 | 0.00137781 | 0          |
| 0.00035721 | 0          | 0 | 0 | 0 | 0          | 0          |
| 0.00321489 | 0          | 0 | 0 | 0 | 0          | 0          |
| 0          | 0.00137781 | 0 | 0 | 0 | 0.00137781 | 0          |
| 0          | 0.01240029 | 0 | 0 | 0 | 0.01240029 | 0          |
| 0.00321489 | 0          | 0 | 0 | 0 | 0          | 0          |
| 0.02893401 | 0          | 0 | 0 | 0 | 0          | 0          |
| 0.00035721 | 0          | 0 | 0 | 0 | 0          | 0          |
| 0.00321489 | 0          | 0 | 0 | 0 | 0          | 0          |
| 0.00083349 | 0          | 0 | 0 | 0 | 0          | 0          |
| 0.00750141 | 0          | 0 | 0 | 0 | 0          | 0          |
| 0.00321489 | 0          | 0 | 0 | 0 | 0          | 0          |
| 0.02893401 | 0          | 0 | 0 | 0 | 0          | 0          |
| 0.00750141 | 0          | 0 | 0 | 0 | 0          | 0          |
| 0.06751269 | 0          | 0 | 0 | 0 | 0          | 0          |
| 0          | 0.00000189 | 0 | 0 | 0 | 0          | 0.00000189 |
| 0          | 0.00001701 | 0 | 0 | 0 | 0          | 0.00001701 |
| 0.00000441 | 0          | 0 | 0 | 0 | 0          | 0          |
| 0.00003969 | 0          | 0 | 0 | 0 | 0          | 0          |
| 0          | 0.00001701 | 0 | 0 | 0 | 0          | 0.00001701 |
| 0          | 0.00015309 | 0 | 0 | 0 | 0          | 0.00015309 |
| 0.00003969 | 0          | 0 | 0 | 0 | 0          | 0          |
| 0.00035721 | 0          | 0 | 0 | 0 | 0          | 0          |
| 0.00000441 | 0          | 0 | 0 | 0 | 0          | 0          |
| 0.00003969 | 0          | 0 | 0 | 0 | 0          | 0          |
| 0.00001029 | 0          | 0 | 0 | 0 | 0          | 0          |
| 0.00009261 | 0          | 0 | 0 | 0 | 0          | 0          |
| 0.00003969 | 0          | 0 | 0 | 0 | 0          | 0          |
| 0.00035721 | 0          | 0 | 0 | 0 | 0          | 0          |
| 0.00009261 | 0          | 0 | 0 | 0 | 0          | 0          |
| 0.00083349 | 0          | 0 | 0 | 0 | 0          | 0          |
| 0          | 0.00001701 | 0 | 0 | 0 | 0          | 0.00001701 |
| 0          | 0.00015309 | 0 | 0 | 0 | 0          | 0.00015309 |
| 0.00003969 | 0          | 0 | 0 | 0 | 0          | 0          |
| 0.00035721 | 0          | 0 | 0 | 0 | 0          | 0          |
| 0          | 0.00015309 | 0 | 0 | 0 | 0          | 0.00015309 |

|            |            |   |   |   |            |   |
|------------|------------|---|---|---|------------|---|
| 0          | 0.00137781 | 0 | 0 | 0 | 0.00137781 | 0 |
| 0.00035721 | 0          | 0 | 0 | 0 | 0          | 0 |
| 0.00321489 | 0          | 0 | 0 | 0 | 0          | 0 |
| 0.00003969 | 0          | 0 | 0 | 0 | 0          | 0 |
| 0.00035721 | 0          | 0 | 0 | 0 | 0          | 0 |
| 0.00009261 | 0          | 0 | 0 | 0 | 0          | 0 |
| 0.00083349 | 0          | 0 | 0 | 0 | 0          | 0 |
| 0.00035721 | 0          | 0 | 0 | 0 | 0          | 0 |
| 0.00321489 | 0          | 0 | 0 | 0 | 0          | 0 |
| 0.00083349 | 0          | 0 | 0 | 0 | 0          | 0 |
| 0.00750141 | 0          | 0 | 0 | 0 | 0          | 0 |
| 0.00000441 | 0          | 0 | 0 | 0 | 0          | 0 |
| 0.00003969 | 0          | 0 | 0 | 0 | 0          | 0 |
| 0.00001029 | 0          | 0 | 0 | 0 | 0          | 0 |
| 0.00009261 | 0          | 0 | 0 | 0 | 0          | 0 |
| 0.00003969 | 0          | 0 | 0 | 0 | 0          | 0 |
| 0.00035721 | 0          | 0 | 0 | 0 | 0          | 0 |
| 0.00009261 | 0          | 0 | 0 | 0 | 0          | 0 |
| 0.00083349 | 0          | 0 | 0 | 0 | 0          | 0 |
| 0.00001029 | 0          | 0 | 0 | 0 | 0          | 0 |
| 0.00009261 | 0          | 0 | 0 | 0 | 0          | 0 |
| 0.00002401 | 0          | 0 | 0 | 0 | 0          | 0 |
| 0.00021609 | 0          | 0 | 0 | 0 | 0          | 0 |
| 0.00009261 | 0          | 0 | 0 | 0 | 0          | 0 |
| 0.00083349 | 0          | 0 | 0 | 0 | 0          | 0 |
| 0.00021609 | 0          | 0 | 0 | 0 | 0          | 0 |
| 0.00194481 | 0          | 0 | 0 | 0 | 0          | 0 |
| 0.00003969 | 0          | 0 | 0 | 0 | 0          | 0 |
| 0.00035721 | 0          | 0 | 0 | 0 | 0          | 0 |
| 0.00009261 | 0          | 0 | 0 | 0 | 0          | 0 |
| 0.00083349 | 0          | 0 | 0 | 0 | 0          | 0 |
| 0.00035721 | 0          | 0 | 0 | 0 | 0          | 0 |
| 0.00321489 | 0          | 0 | 0 | 0 | 0          | 0 |
| 0.00083349 | 0          | 0 | 0 | 0 | 0          | 0 |
| 0.00750141 | 0          | 0 | 0 | 0 | 0          | 0 |
| 0.00009261 | 0          | 0 | 0 | 0 | 0          | 0 |

|            |            |   |   |   |            |            |
|------------|------------|---|---|---|------------|------------|
| 0.00083349 | 0          | 0 | 0 | 0 | 0          | 0          |
| 0.00021609 | 0          | 0 | 0 | 0 | 0          | 0          |
| 0.00194481 | 0          | 0 | 0 | 0 | 0          | 0          |
| 0.00083349 | 0          | 0 | 0 | 0 | 0          | 0          |
| 0.00750141 | 0          | 0 | 0 | 0 | 0          | 0          |
| 0.00194481 | 0          | 0 | 0 | 0 | 0          | 0          |
| 0.01750329 | 0          | 0 | 0 | 0 | 0          | 0          |
| 0          | 0.00001701 | 0 | 0 | 0 | 0          | 0.00001701 |
| 0          | 0.00015309 | 0 | 0 | 0 | 0          | 0.00015309 |
| 0.00003969 | 0          | 0 | 0 | 0 | 0          | 0          |
| 0.00035721 | 0          | 0 | 0 | 0 | 0          | 0          |
| 0          | 0.00015309 | 0 | 0 | 0 | 0          | 0.00015309 |
| 0          | 0.00137781 | 0 | 0 | 0 | 0.00137781 | 0          |
| 0.00035721 | 0          | 0 | 0 | 0 | 0          | 0          |
| 0.00321489 | 0          | 0 | 0 | 0 | 0          | 0          |
| 0.00003969 | 0          | 0 | 0 | 0 | 0          | 0          |
| 0.00035721 | 0          | 0 | 0 | 0 | 0          | 0          |
| 0.00009261 | 0          | 0 | 0 | 0 | 0          | 0          |
| 0.00083349 | 0          | 0 | 0 | 0 | 0          | 0          |
| 0.00035721 | 0          | 0 | 0 | 0 | 0          | 0          |
| 0.00321489 | 0          | 0 | 0 | 0 | 0          | 0          |
| 0.00083349 | 0          | 0 | 0 | 0 | 0          | 0          |
| 0.00750141 | 0          | 0 | 0 | 0 | 0          | 0          |
| 0          | 0.00015309 | 0 | 0 | 0 | 0          | 0.00015309 |
| 0          | 0.00137781 | 0 | 0 | 0 | 0.00137781 | 0          |
| 0.00035721 | 0          | 0 | 0 | 0 | 0          | 0          |
| 0.00321489 | 0          | 0 | 0 | 0 | 0          | 0          |
| 0          | 0.00137781 | 0 | 0 | 0 | 0.00137781 | 0          |
| 0          | 0.01240029 | 0 | 0 | 0 | 0.01240029 | 0          |
| 0.00321489 | 0          | 0 | 0 | 0 | 0          | 0          |
| 0.02893401 | 0          | 0 | 0 | 0 | 0          | 0          |
| 0.00035721 | 0          | 0 | 0 | 0 | 0          | 0          |
| 0.00321489 | 0          | 0 | 0 | 0 | 0          | 0          |
| 0.00083349 | 0          | 0 | 0 | 0 | 0          | 0          |
| 0.00750141 | 0          | 0 | 0 | 0 | 0          | 0          |
| 0.00321489 | 0          | 0 | 0 | 0 | 0          | 0          |



|            |   |   |   |   |   |   |   |
|------------|---|---|---|---|---|---|---|
| 0.02893401 | 0 | 0 | 0 | 0 | 0 | 0 | 0 |
| 0.00750141 | 0 | 0 | 0 | 0 | 0 | 0 | 0 |
| 0.06751269 | 0 | 0 | 0 | 0 | 0 | 0 | 0 |
| 0.00003969 | 0 | 0 | 0 | 0 | 0 | 0 | 0 |
| 0.00035721 | 0 | 0 | 0 | 0 | 0 | 0 | 0 |
| 0.00009261 | 0 | 0 | 0 | 0 | 0 | 0 | 0 |
| 0.00083349 | 0 | 0 | 0 | 0 | 0 | 0 | 0 |
| 0.00035721 | 0 | 0 | 0 | 0 | 0 | 0 | 0 |
| 0.00321489 | 0 | 0 | 0 | 0 | 0 | 0 | 0 |
| 0.00083349 | 0 | 0 | 0 | 0 | 0 | 0 | 0 |
| 0.00750141 | 0 | 0 | 0 | 0 | 0 | 0 | 0 |
| 0.00009261 | 0 | 0 | 0 | 0 | 0 | 0 | 0 |
| 0.00083349 | 0 | 0 | 0 | 0 | 0 | 0 | 0 |
| 0.00021609 | 0 | 0 | 0 | 0 | 0 | 0 | 0 |
| 0.00194481 | 0 | 0 | 0 | 0 | 0 | 0 | 0 |
| 0.00083349 | 0 | 0 | 0 | 0 | 0 | 0 | 0 |
| 0.00750141 | 0 | 0 | 0 | 0 | 0 | 0 | 0 |
| 0.00194481 | 0 | 0 | 0 | 0 | 0 | 0 | 0 |
| 0.01750329 | 0 | 0 | 0 | 0 | 0 | 0 | 0 |
| 0.00035721 | 0 | 0 | 0 | 0 | 0 | 0 | 0 |
| 0.00321489 | 0 | 0 | 0 | 0 | 0 | 0 | 0 |
| 0.00083349 | 0 | 0 | 0 | 0 | 0 | 0 | 0 |
| 0.00750141 | 0 | 0 | 0 | 0 | 0 | 0 | 0 |
| 0.00321489 | 0 | 0 | 0 | 0 | 0 | 0 | 0 |
| 0.02893401 | 0 | 0 | 0 | 0 | 0 | 0 | 0 |
| 0.00750141 | 0 | 0 | 0 | 0 | 0 | 0 | 0 |
| 0.06751269 | 0 | 0 | 0 | 0 | 0 | 0 | 0 |
| 0.00083349 | 0 | 0 | 0 | 0 | 0 | 0 | 0 |
| 0.00750141 | 0 | 0 | 0 | 0 | 0 | 0 | 0 |
| 0.00194481 | 0 | 0 | 0 | 0 | 0 | 0 | 0 |
| 0.01750329 | 0 | 0 | 0 | 0 | 0 | 0 | 0 |
| 0.00750141 | 0 | 0 | 0 | 0 | 0 | 0 | 0 |
| 0.06751269 | 0 | 0 | 0 | 0 | 0 | 0 | 0 |
| 0.01750329 | 0 | 0 | 0 | 0 | 0 | 0 | 0 |
| 0.15752961 | 0 | 0 | 0 | 0 | 0 | 0 | 0 |

|            |            |            |             |             |             |             |        |
|------------|------------|------------|-------------|-------------|-------------|-------------|--------|
| 0.9163     | 0.0756     | 0.0081     | 0.00767637  | 0.00042363  | 0.07164612  | 0.00395388  |        |
| 0.45164427 | 0.03726324 | 0.00399249 | 0.003783683 | 0.000208807 | 0.035314373 | 0.001948867 |        |
|            |            | 1          |             |             |             | 0.0837      | 1      |
|            |            | 0.4929     |             |             |             | 0.04125573  | 0.4929 |

\*Probabilities of the three possible outcomes (MTD exceeded, MTI achieved in 5 or more of 6 patients, and dose escalation) were calculated using a range of probabilities of DLT and greater than 90% DPP-4 inhibition. At a given dose level, if the true probability of MTI is 0.90 and true DLT probability is 0.05, the probability of exceeding the MTD is 0.03, of achieving MTI in 5 or more of 6 patients is 0.76 and of dose escalation is 0.21. With a true probability of MTI of 0.90 and an unacceptable DLT probability of 0.33, the outcome probabilities become 0.61, 0.29, and 0.10, respectively, whereas if the DPP-4 inhibition probability is 0.50 with a 0.05 DLT probability, outcome probabilities are 0.02, 0.10, and 0.88, respectively. DLT = dose-limiting toxicity. PD = Progressive Disease.
